# Supplementary material for: Lung Adenocarcinoma Mouse Models Based on Orthotopic Transplantation of Syngeneic Tumor-Initiating Cells Expressing EpCAM, SCA-1, and Ly6d
Source: MDPI journal article supplement (doi:10.3390/cancers12123805), 2020-12-17
Supplement: s1 [file s1]

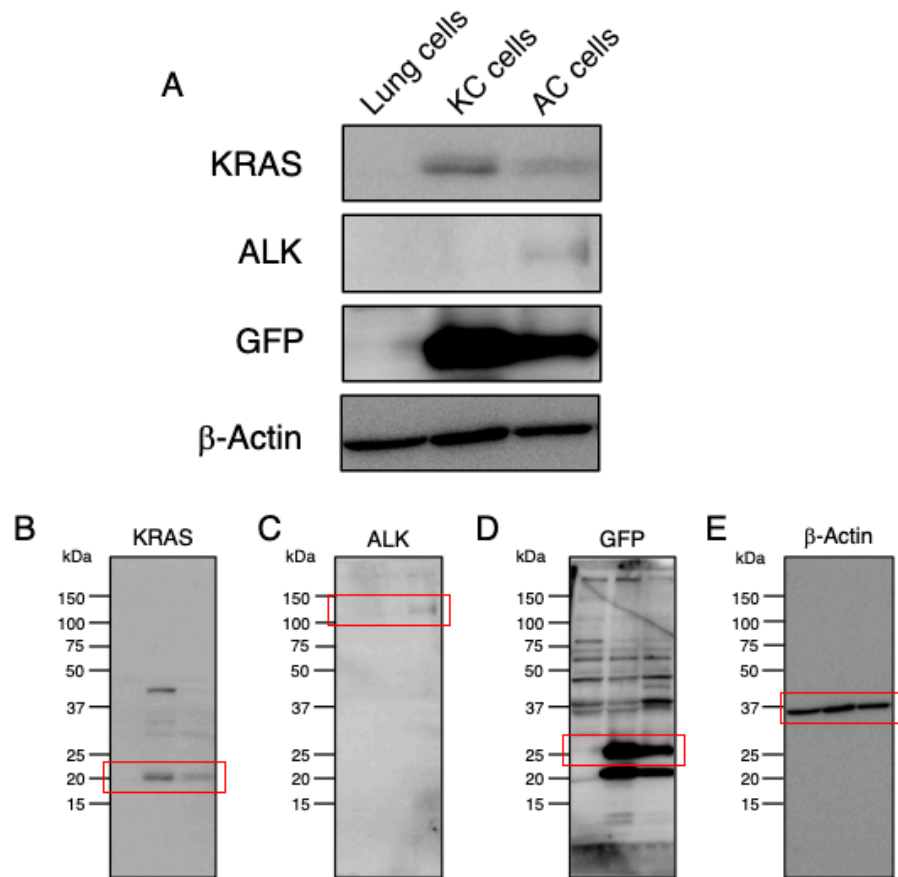

**Supplementary Figure S1.** The expressions of KRAS, ALK, and GFP. (A) Immunoblot analysis of KRAS, ALK, and GFP in cultured *Cdkn2a*<sup>-/-</sup> lung cells, KC, and AC cells.  $\beta$ -Actin was examined as a loading control. (B - E) The whole immunoblotting image for KRAS (B), ALK (C), GFP (D), and  $\beta$ -Actin (E).

**A**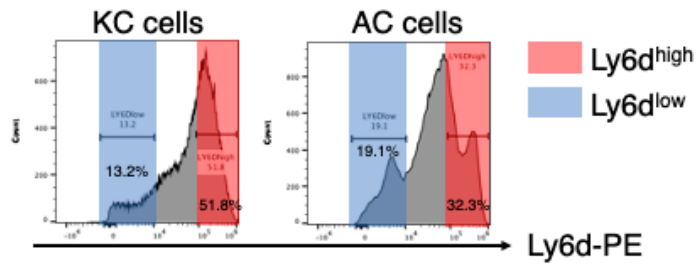**B**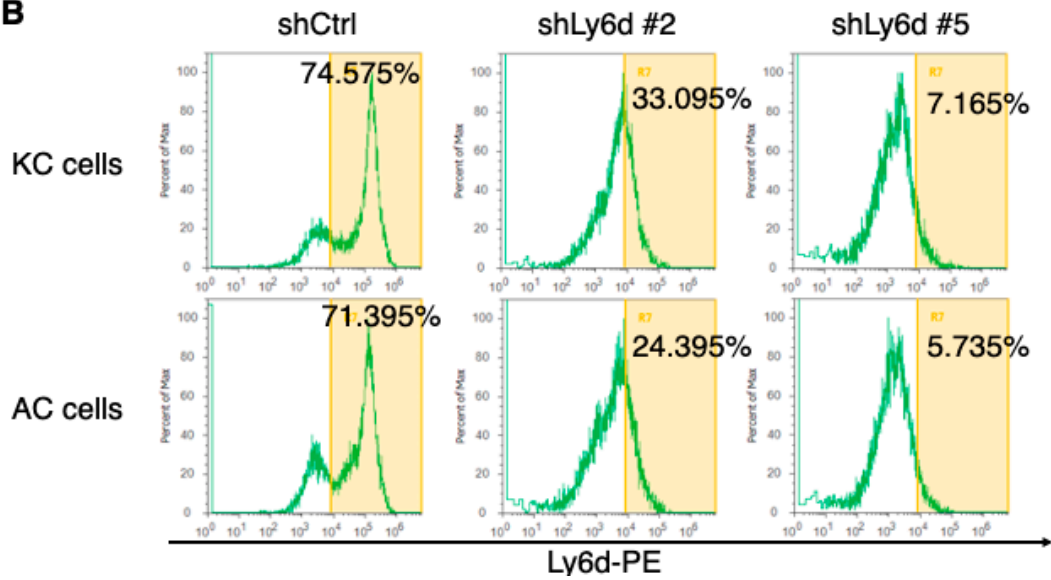

**Supplementary Figure S2.** Ly6d expression in KC and AC cells. (A) Gating strategy for isolation of Ly6d<sup>high</sup> and Ly6d<sup>low</sup> cells from KC and AC cells by FACS. (B) Validation of shRNA-mediated knockdown of Ly6d expression in KC and AC cells by flow cytometry.

1. Place anesthetized mouse on a tilted platform

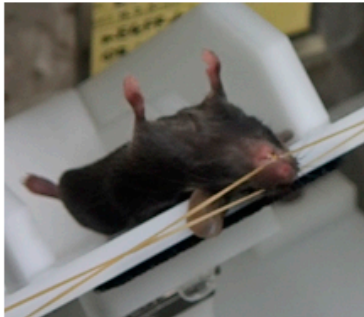

2. Direct a light toward the upper chest of the mouse

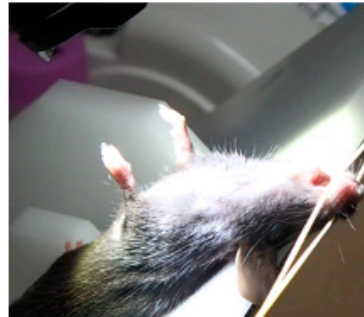

3. Visualize the glottis of the mouse (arrow)

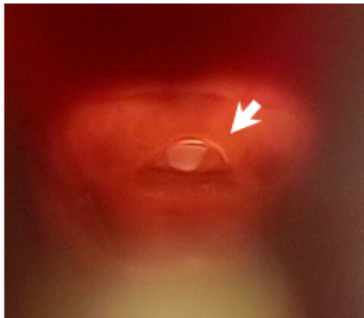

4. Insert a cannula into the airway of the mouse

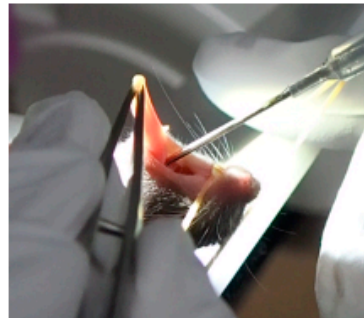

**Supplementary Figure S3.** Procedure for intratracheal injection.

**Supplementary Table S1.** List of PCR primer sequences. Fw, forward; Rv, reverse.

| Gene symbol    |    | Sequence (5' → 3')     |
|----------------|----|------------------------|
| <i>Psca</i>    | Fw | TCATCTGTGCTGTGCATGAAT  |
|                | Rv | GCTCACTGCAACCATGAAGA   |
| <i>Slurp1</i>  | Fw | GTCACCATGGGACTGTGGTT   |
|                | Rv | TTGCTCAGTGCAAGATGGAA   |
| <i>Lypd2</i>   | Fw | GCATCCAACCTGTGTCACCAC  |
|                | Rv | GTCAGAATTGCAGCAGGACA   |
| <i>Slurp2</i>  | Fw | TCCACCCACTGTGTCATCAT   |
|                | Rv | GGAGTGTGGTCAGTCCCTGT   |
| <i>Lynx1</i>   | Fw | TGCCTGAGCTCTTGGTCTCT   |
|                | Rv | TACCAACACCGCACGAAGT    |
| <i>Ly6d</i>    | Fw | AGACAGCTCTGCTCGTCCTC   |
|                | Rv | CTGTAGTCGGAGGTGCATGA   |
| <i>Ly6k</i>    | Fw | CAGGCATAGCTGTTCTGCG    |
|                | Rv | CCTAGTGGCCTTGCTCGTAG   |
| <i>Gml</i>     | Fw | TCTTGTGCTGTGGGAGTGTC   |
|                | Rv | CTGGAGAGGATCAAGGCAAG   |
| <i>Ly6e</i>    | Fw | ACAGCACAGGCAGGAAGACT   |
|                | Rv | TCGGTATTATCTTCGGGGC    |
| <i>Ly6a</i>    | Fw | GGCAGATGGGTAAGCAAAGA   |
|                | Rv | CAATTACCTGCCCCTACCCT   |
| <i>Ly6h</i>    | Fw | AATTGGCCAGGGTGCACT     |
|                | Rv | ATGAAGAGCCTCGGTCTGG    |
| <i>Gpihbp1</i> | Fw | CTGGAGCAGCTCTGTGTCTG   |
|                | Rv | ACCAACATGATCCCTGGAAG   |
| <i>Gapdh</i>   | Fw | GTGAAGGTCGGTGTGAACG    |
|                | Rv | GACCATGTAGTTGAGGTCAATG |

## **Supplementary Materials and Methods**

### *Immunoblot analysis*

Cultured lung cells, KC and AC cells were collected by digesting Matrigel using Cell Dissociation Solution (Corning, Corning, NY, USA). Cells were lysed with SDS sample buffer (2% SDS, 10% glycerol, 50 mM Tris-HCl [pH 6.8]) containing 1 M DTT for fractionation by SDS-PAGE. The separated proteins were transferred to a polyvinylidene difluoride membrane and exposed to anti-KRAS antibody (C-19; Santa Cruz Biotechnology, Dallas, TX, USA), anti-ALK antibody (D5F3; Cell Signaling Technology, Danvers, MA, USA), anti-GFP antibody (FL, Santa Cruz Biotechnology), and anti- $\beta$ -Actin antibody (sc-47778, Santa Cruz Biotechnology). Immune complexes were detected with horseradish peroxidase-conjugated anti-rabbit antibody (Agilent, Santa Clara, CA, USA) or anti-mouse antibody (Agilent) and enhanced chemiluminescence reagents (Chemi-Lumi One L, Nacalai Tesque, Kyoto, Japan).
